# Supplementary material for: A molecularly imprinted poly 2-aminophenol–gold nanoparticle–reduced graphene oxide composite for electrochemical determination of flutamide in environmental and biological samples
Source: Royal Society of Chemistry journal article supplement (doi:10.1039/d0ay01812k), 2020-12-18
Supplement: d0ay01812k1.pdf [file d0ay01812k1.pdf]

## Supplementary materials

### **Molecularly imprinted poly 2-aminophenol-gold nanoparticles-reduced graphene oxide composite for electrochemical determination of flutamide in environmental and biological samples**

Mohammad Kadivar, Alireza Aliakbar\*

*Department of chemistry, Faculty of Science, University of Guilan, P. O.  
Box 4193833697*

*Rasht, Iran*

*Corresponding author. Tel.: +98-13-33367343; Fax: +98-13-33367066*

*Corresponding author Email: [aliakbar@guilan.ac.ir](mailto:aliakbar@guilan.ac.ir)*

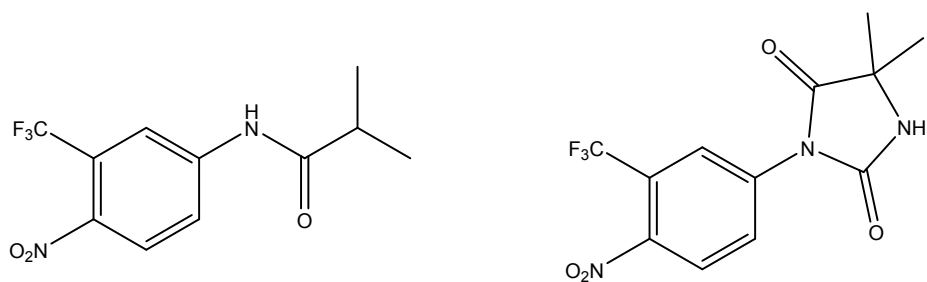

Flutamide

Nilutamide

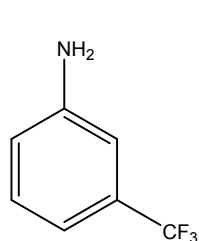

3-(Trifluoromethyl)aniline

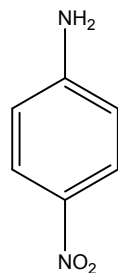

4-Nitroaniline

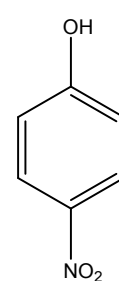

4-Nitrophenol

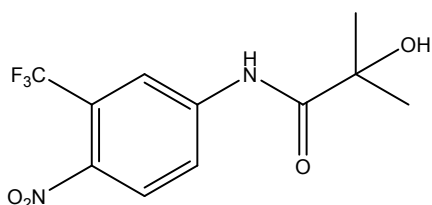

Hydroxyflutamide

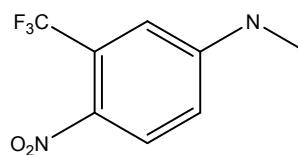

N,N-dimethyl-4-nitro-3-(trifluoromethyl)aniline

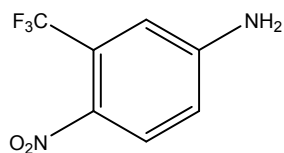

4-Nitro-3-(trifluoromethyl)aniline

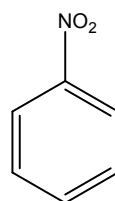

Nitrobenzene

Scheme S1. Chemical structure of flutamide, nilutamide, 3-(Trifluoromethyl)aniline, 4-Nitroaniline, 4-Nitrophenol, hydroxyflutamide, N,N-dimethyl-4-nitro-3-(trifluoromethyl)aniline, 4-Nitro-3-(trifluoromethyl)aniline and Nitrobenzene.

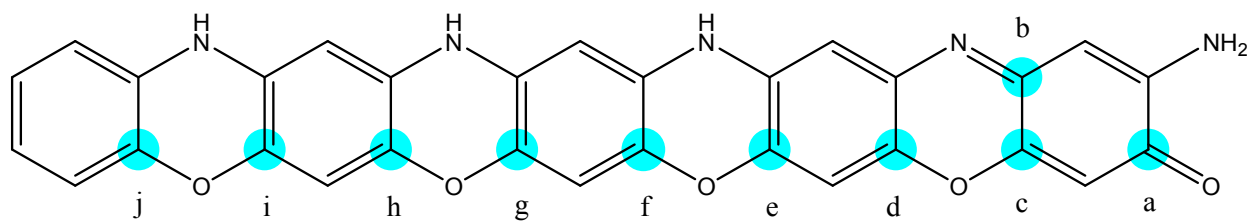

Scheme S2. The proposed pentameric structure of the synthesized MPAP.

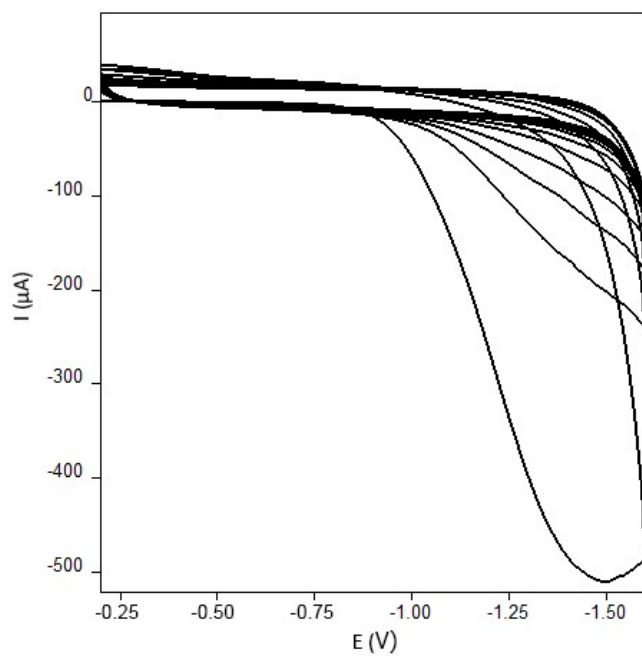

Fig. S1. The preparation of the rGO modified electrode using cyclic voltammetry at scan rate of 50 mV/s for 20 cycles in  $\text{Na}_2\text{SO}_4$  (25mM).

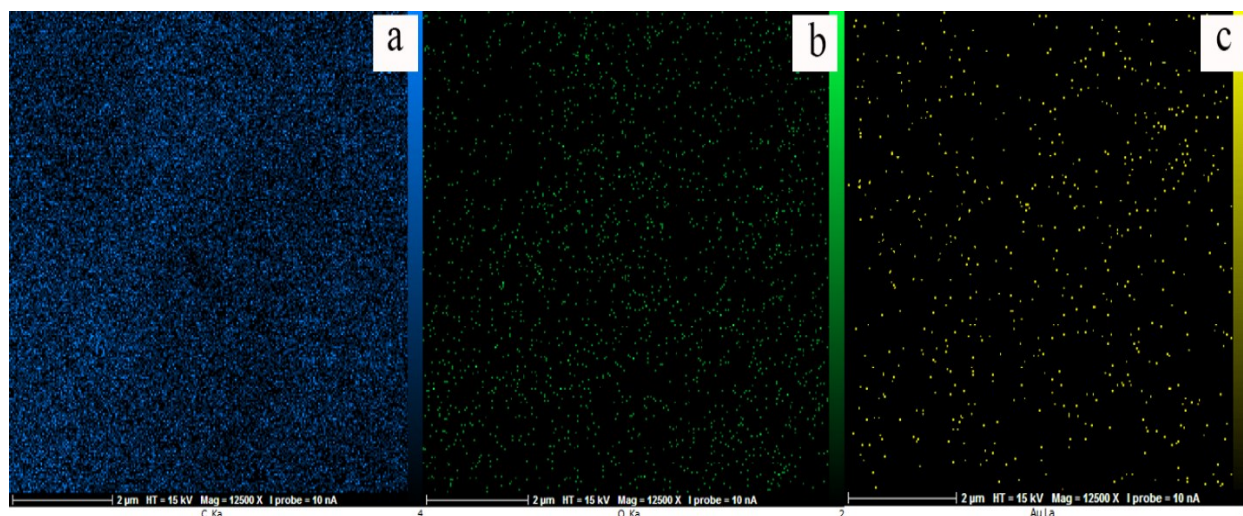

Fig. S2. The elemental EDS mapping images of the rGO-Au modified electrode surface (a: carbon, b: oxygen and c: gold)

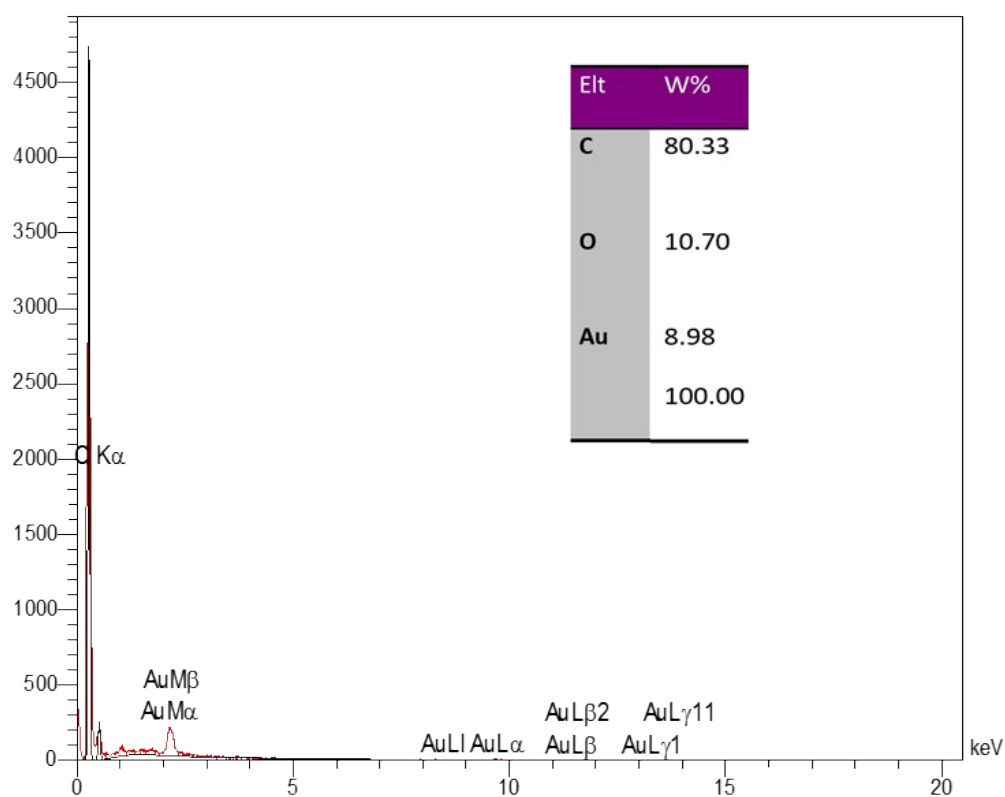

Fig. S3. The EDS spectrum of the rGO-Au modified electrode surface.

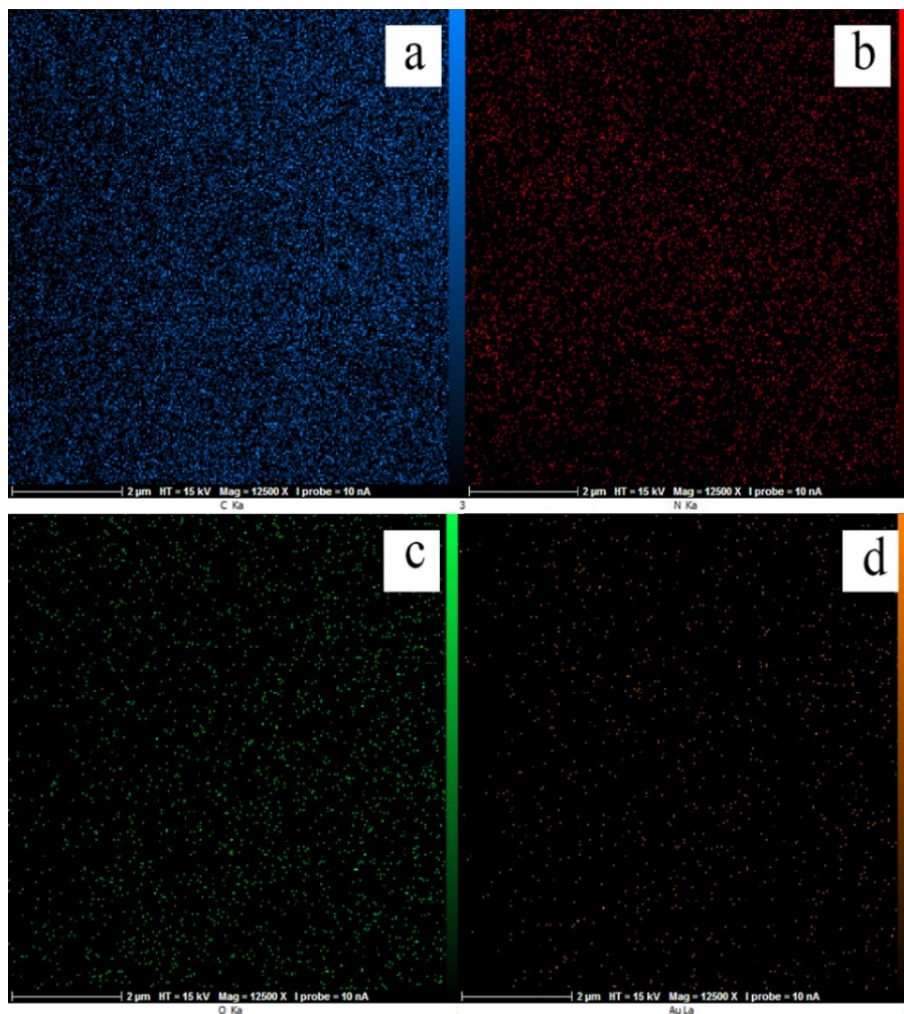

Fig. S4. The elemental EDS mapping images of the rGO-Au-MPAP modified electrode (a: carbon, b: nitrogen, c: oxygen and d: gold)

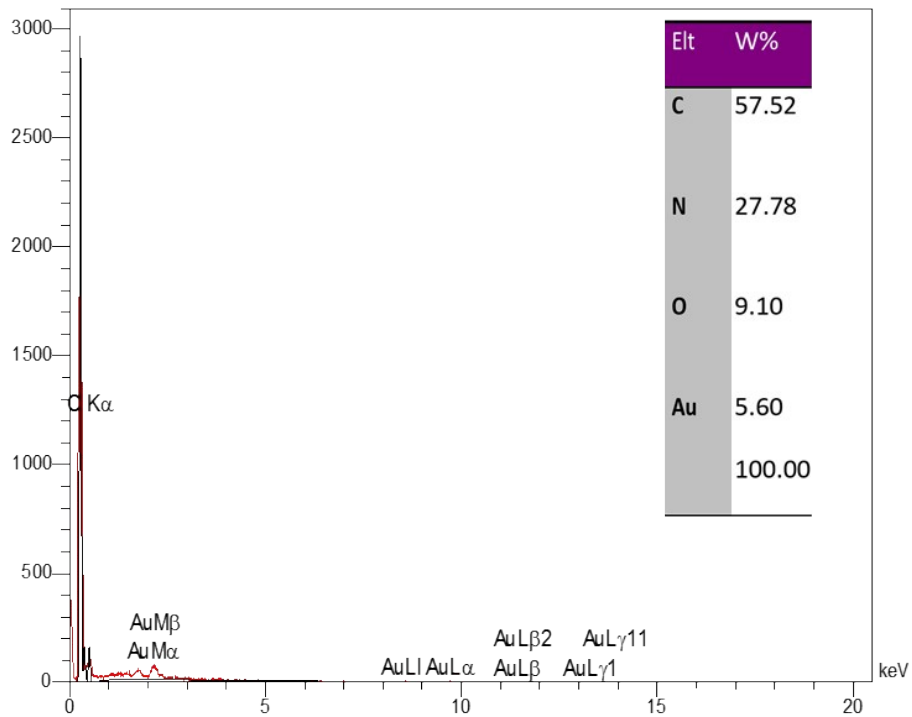

Fig. S5. The EDS spectrum of the rGO-Au-MPAP modified electrode surface.

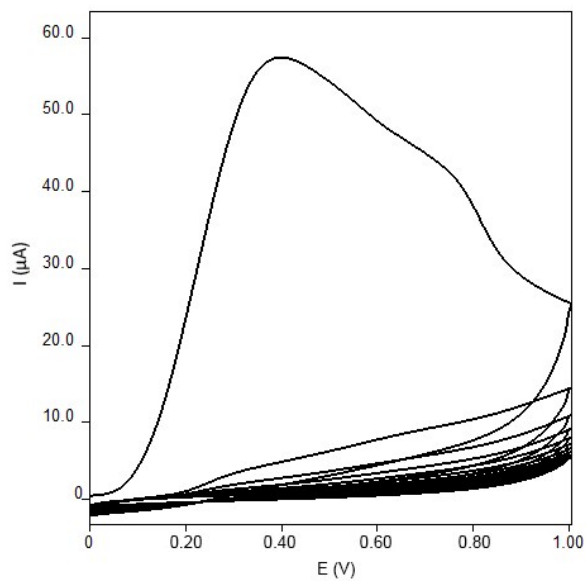

Fig. S6. The cyclic voltammograms of 2- aminophenol (0.05 mM) in a phosphate buffer solution (pH=8, 0.05M) at scan rate of 50 mV/s for 30 cycles.

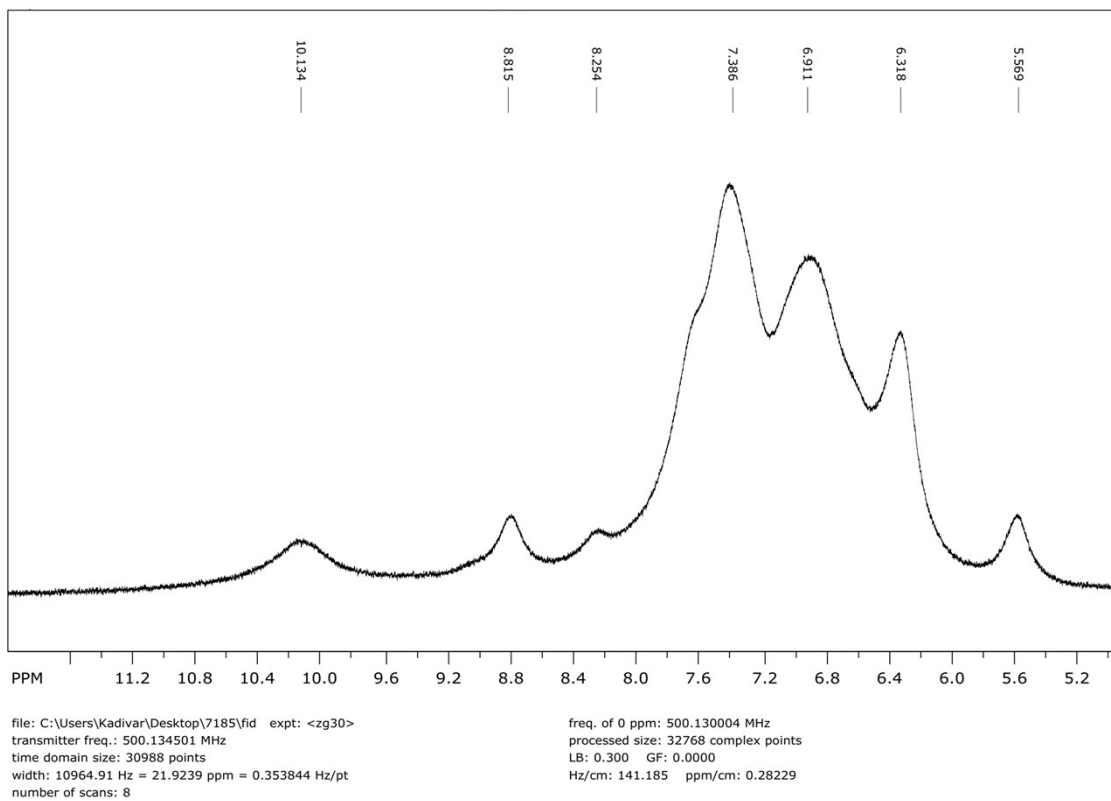

Fig. S7. The <sup>1</sup>H NMR spectrum of the synthesized MPAP.

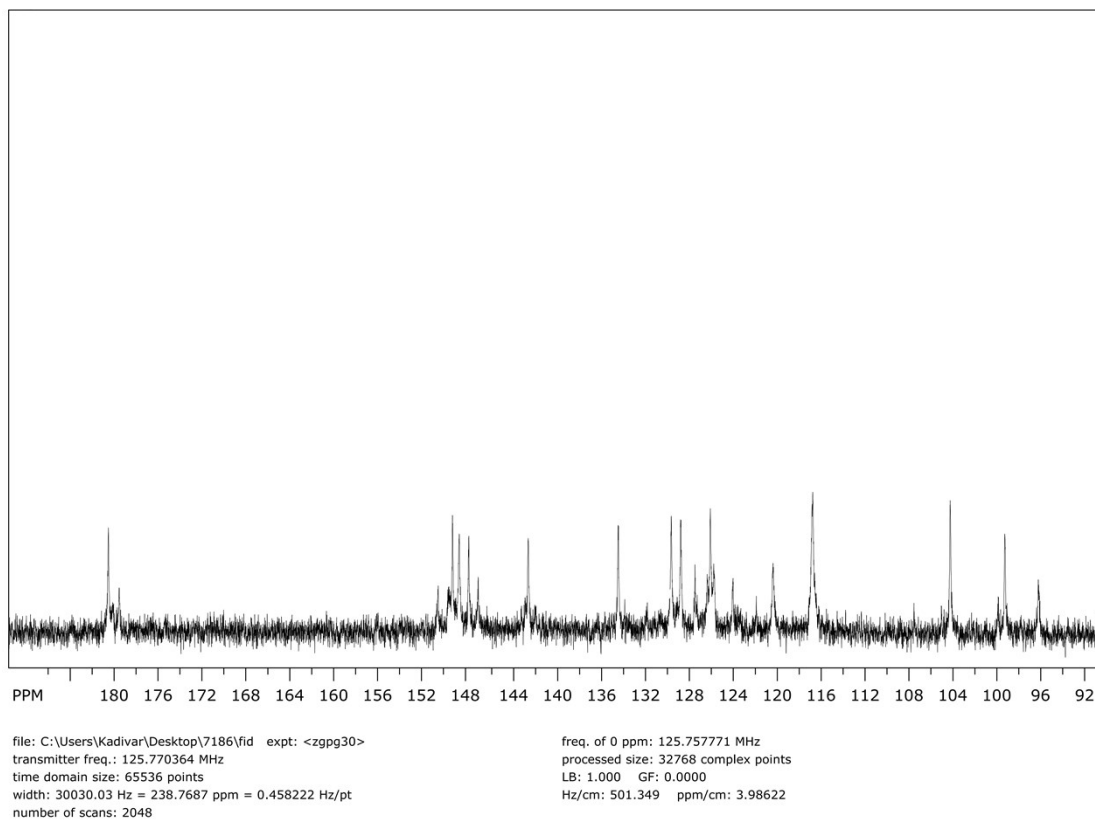

Fig. S8. The C NMR spectrum of the synthesized MPAP.



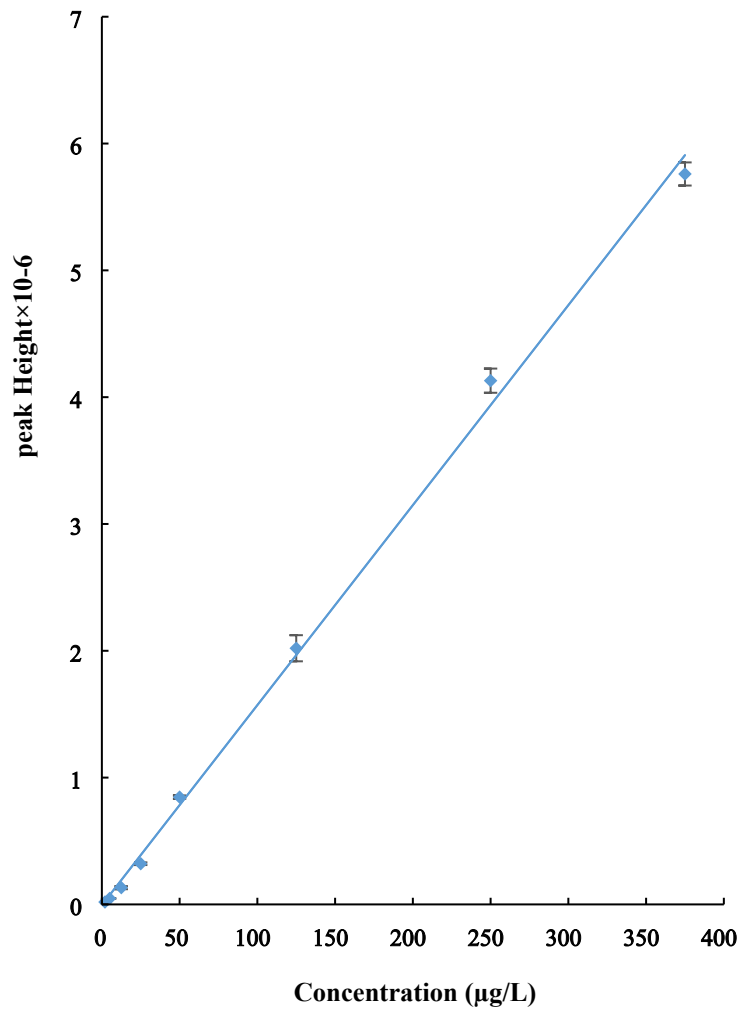

Fig. S9. The calibration curve of flutamide using the obtained peak heights.

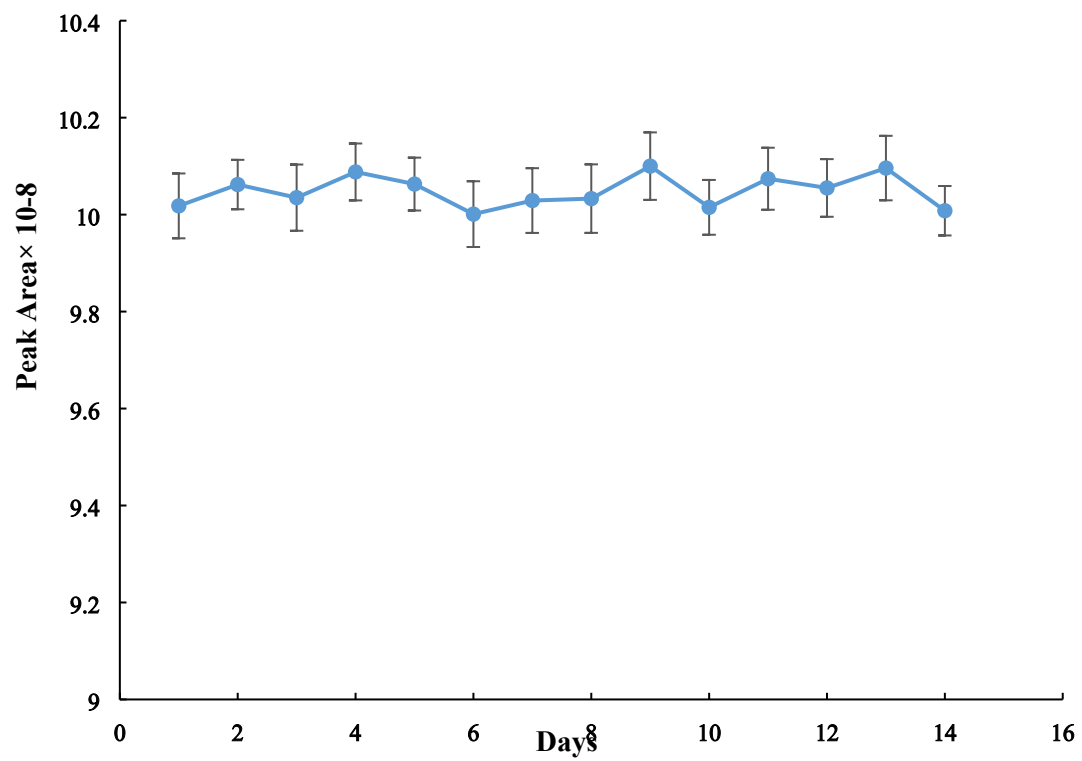

Fig. S10. The Stability of the rGO-Au-MPAP modified electrode performance in 2 weeks.
